# Supplementary material for: How being synanthropic affects the gut bacteriome and mycobiome: comparison of two mouse species with contrasting ecologies
Source: BMC Microbiol. 2020 Jul 6;20:194. doi: 10.1186/s12866-020-01859-8 (PMC7336484; doi:10.1186/s12866-020-01859-8)
Supplement: Supplementary file 3 — Additional file 3: Table S1. Average proportions of bacterial taxa detected in three gut sections (ileum, caecum and colon) of two wild mouse species (Mus musculus, Mus spicilegus). [file 12866_2020_1859_MOESM3_ESM.xlsx]

## Sheet: TAB_Genus_Species_gut-section_Mean
						Mus musculus			Mus spicilegus
Phylum	Class	Order	Family	Genus	Grand mean	Ileum	Caecum	Colon	Ileum	Caecum	Colon
Proteobacteria	Epsilonproteobacteria	Campylobacterales	Helicobacteraceae	Helicobacter	0.217506	0.054947	0.229859	0.316608	0.126678	0.310752	0.252297
Firmicutes	Clostridia	Clostridiales	Lachnospiraceae		0.126825	0.0473498	0.126855	0.160247	0.113604	0.113781	0.17447
Firmicutes	Clostridia	Clostridiales			0.096214	0.0897527	0.0911661	0.1447	0.0595406	0.0905603	0.119346
Firmicutes	Bacilli	Lactobacillales	Lactobacillaceae	Lactobacillus	0.0847855	0.336042	0.00795053	0.0132509	0.170671	0.00595659	0.0164311
Bacteroidetes	Bacteroidia	Bacteroidales	S24-7		0.0703483	0.0431095	0.0832155	0.0745583	0.0465548	0.0827865	0.0883392
Deferribacteres	Deferribacteres	Deferribacterales	Deferribacteraceae	Mucispirillum	0.0605553	0.020318	0.1053	0.0257951	0.0465548	0.107824	0.0483216
Tenericutes	Mollicutes	Mycoplasmatales	Mycoplasmataceae	Mycoplasma	0.0516103	0.191343	0.0176678	0.0173145	0.104594	0.00373549	0.00477032
Bacteroidetes	Bacteroidia	Bacteroidales	Bacteroidaceae	Bacteroides	0.0425644	0.0378092	0.10477	0.0998233	0.0165194	0.024634	0.0269435
Firmicutes	Clostridia	Clostridiales	Ruminococcaceae	Oscillospira	0.0391116	0.00318021	0.035159	0.0261484	0.0337456	0.0488642	0.0623675
Bacteroidetes	Bacteroidia	Bacteroidales	[Odoribacteraceae]	Odoribacter	0.0232812	0.00671378	0.0399293	0.0234982	0.0126325	0.0294801	0.0283569
Tenericutes	Mollicutes	Mycoplasmatales	Mycoplasmataceae		0.0213831	0.0390459	0.00176678	0	0.0657244	0.0044422	0.00353357
Bacteroidetes	Bacteroidia	Bacteroidales	Rikenellaceae		0.0204543	0.00671378	0.0272085	0.0257951	0.0128092	0.0234225	0.0263251
Firmicutes	Clostridia	Clostridiales	Lachnospiraceae	[Ruminococcus]	0.0146996	0.00176678	0.0128975	0.0116608	0.0212014	0.0164563	0.0155477
Firmicutes	Clostridia	Clostridiales	Clostridiaceae	Candidatus Arthromitus	0.0142352	0.0738516	0.00212014	0.000706714	0.0239399	0	0
Proteobacteria	Deltaproteobacteria	Desulfovibrionales	Desulfovibrionaceae		0.014215	0.00759717	0.0236749	0.0134276	0.0130742	0.0178698	0.0111307
Bacteroidetes	Bacteroidia	Bacteroidales			0.0140737	0.00477032	0.00777385	0.00565371	0.00962898	0.0235235	0.0222615
Bacteroidetes					0.0133872	0	0.00335689	0.00353357	0.014841	0.0205957	0.0222615
Proteobacteria	Gammaproteobacteria	Pasteurellales	Pasteurellaceae	Aggregatibacter	0.0103584	0.000353357	0	0	0.0440813	0.000504796	0.000618375
Firmicutes	Clostridia	Clostridiales	Ruminococcaceae	Ruminococcus	0.00720848	0.000706714	0.00706714	0.0065371	0.00777385	0.00787481	0.00971731
Spirochaetes	[Brachyspirae]	[Brachyspirales]	Brachyspiraceae	Brachyspira	0.00672388	0	0.0335689	0.000176678	0	0.0121151	0.00194346
Bacteroidetes	Bacteroidia	Bacteroidales	Porphyromonadaceae	Parabacteroides	0.00482585	0.00141343	0.00759717	0.010424	0.00273852	0.00403836	0.00512367
Firmicutes	Clostridia	Clostridiales	Lachnospiraceae	Roseburia	0.00415952	0	0.000176678	0.000706714	0.00291519	0.00625946	0.00936396
Firmicutes	Clostridia	Clostridiales	Lachnospiraceae	Coprococcus	0.00405856	0.000530035	0.000530035	0.00212014	0.00353357	0.00524987	0.00803887
Bacteroidetes	Bacteroidia	Bacteroidales	Rikenellaceae	Rikenella	0.00353357	0	0.000883392	0.000176678	0.0020318	0.00545179	0.00812721
TM7	TM7-3	CW040	F16		0.0027057	0	0.000353357	0.000353357	0.00106007	0.00585563	0.00530035
Bacteroidetes	Bacteroidia	Bacteroidales	Prevotellaceae	Prevotella	0.00244321	0.00123675	0.00194346	0.00212014	0.00150177	0.00363453	0.00335689
Bacteroidetes	Bacteroidia	Bacteroidales	[Paraprevotellaceae]	[Prevotella]	0.00220091	0	0.000176678	0.000530035	0.00132509	0.00625946	0.0024735
Proteobacteria	Gammaproteobacteria	Enterobacteriales	Enterobacteriaceae	Escherichia	0.00207976	0	0	0	0.00724382	0.00131247	0.000706714
Firmicutes	Clostridia	Clostridiales	Ruminococcaceae	Anaerotruncus	0.00165573	0.00123675	0.0024735	0.00318021	0.000971731	0.00141343	0.00159011
Firmicutes	Clostridia	Clostridiales	Dehalobacteriaceae	Dehalobacterium	0.00163554	0	0.00176678	0.00106007	0.00167845	0.0022211	0.00212014
Proteobacteria	Gammaproteobacteria	Pasteurellales	Pasteurellaceae		0.00161535	0	0	0	0.00706714	0	0
Proteobacteria	Epsilonproteobacteria	Campylobacterales	Helicobacteraceae	Flexispira	0.00155477	0	0.00512367	0.00141343	0	0.00232206	0.00150177
Proteobacteria	Deltaproteobacteria	Desulfovibrionales	Desulfovibrionaceae	Bilophila	0.00151439	0.000883392	0.00176678	0.000883392	0.0020318	0.00111055	0.00185512
Bacteroidetes	Bacteroidia	Bacteroidales	Rikenellaceae	AF12	0.00135285	0.000176678	0.00229682	0.00106007	0.000530035	0.00121151	0.00256184
Actinobacteria	Coriobacteriia	Coriobacteriales	Coriobacteriaceae	Adlercreutzia	0.00115093	0.000176678	0.00176678	0.00106007	0.000795053	0.000706714	0.00212014
Firmicutes	Clostridia	Clostridiales	Clostridiaceae	Clostridium	0.00111055	0.00883392	0.000176678	0.000176678	0	0.000100959	0.000176678
Firmicutes	Clostridia	Clostridiales	Ruminococcaceae	Butyricicoccus	0.00100959	0	0.000883392	0.00123675	0.000441696	0.00131247	0.00176678
Firmicutes	Clostridia	Clostridiales	Lachnospiraceae	Dorea	0.000989399	0.000176678	0.000883392	0.000176678	0.00106007	0.00121151	0.00159011
Firmicutes	Clostridia	Clostridiales	Ruminococcaceae		0.000827865	0	0.00106007	0.000706714	0.000883392	0.000605755	0.00132509
Firmicutes	Bacilli	Lactobacillales	Streptococcaceae	Streptococcus	0.000787481	0.000530035	0	0	0.00318021	0	0
Proteobacteria	Deltaproteobacteria	Desulfovibrionales	Desulfovibrionaceae	Desulfovibrio	0.000767289	0.000530035	0.00212014	0.000176678	0.000795053	0.000504796	0.000706714
Tenericutes	Mollicutes	Anaeroplasmatales	Anaeroplasmataceae	Anaeroplasma	0.000747097	0	0	0	0.000265018	0.00141343	0.00176678
Bacteroidetes	[Saprospirae]	[Saprospirales]	Chitinophagaceae	Sediminibacterium	0.000747097	0.00159011	0	0	0.0024735	0	0
Proteobacteria	Betaproteobacteria	Burkholderiales	Comamonadaceae	Comamonas	0.000726906	0.00636042	0	0	0	0	0
Cyanobacteria	4C0d-2	YS2			0.000605755	0	0.00141343	0	0.000176678	0.000908632	0.000971731
Firmicutes	Clostridia	Clostridiales	[Mogibacteriaceae]		0.000545179	0	0.000530035	0	0.000176678	0.000706714	0.00132509
Proteobacteria	Alphaproteobacteria	Rickettsiales			0.000504796	0.000353357	0.00300353	0.000706714	0	0	0.000176678
Firmicutes	Bacilli	Gemellales	Gemellaceae	Gemella	0.000403836	0.00123675	0	0	0.00114841	0	0
Proteobacteria	Epsilonproteobacteria	Campylobacterales	Helicobacteraceae		0.000282686	0	0.000530035	0	0	0.000100959	0.000883392
Proteobacteria	Alphaproteobacteria	Rhizobiales	Methylobacteriaceae	Methylobacterium	0.000242302	0.000353357	0	0.000176678	0.000795053	0	0
Proteobacteria	Alphaproteobacteria	Rhodospirillales	Acetobacteraceae		0.00022211	0.00194346	0	0	0	0	0
Proteobacteria	Gammaproteobacteria	Oceanospirillales	Oceanospirillaceae	Marinomonas	0.00022211	0.00141343	0	0	0.000265018	0	0
Firmicutes	Erysipelotrichi	Erysipelotrichales	Erysipelotrichaceae		0.000161535	0	0.000530035	0.000883392	0	0	0
Tenericutes	Mollicutes	Mycoplasmatales	Mycoplasmataceae	Ureaplasma	0.000161535	0	0	0	0.000706714	0	0
Proteobacteria	Alphaproteobacteria	Rhodobacterales	Rhodobacteraceae	Paracoccus	0.000161535	0.00141343	0	0	0	0	0
Proteobacteria	Alphaproteobacteria	Rhizobiales	Rhizobiaceae	Agrobacterium	0.000161535	0.000176678	0	0	0.000618375	0	0
Proteobacteria	Gammaproteobacteria	Xanthomonadales	Sinobacteraceae		0.000161535	0	0	0	0.000706714	0	0
Firmicutes	Clostridia	Clostridiales	Peptococcaceae		0.000121151	0	0	0	0.000353357	0.000201918	0
Firmicutes	Bacilli	Lactobacillales			0.000100959	0	0	0	0.000441696	0	0
Firmicutes	Clostridia	Clostridiales	Ruminococcaceae	Clostridium	0.000100959	0	0	0	0.000265018	0.000201918	0
Proteobacteria	Alphaproteobacteria	Rhizobiales	Bradyrhizobiaceae	Bradyrhizobium	0.000100959	0.000353357	0	0	0.000265018	0	0
Proteobacteria	Betaproteobacteria	Burkholderiales	Alcaligenaceae	Sutterella	0.000100959	0	0.000176678	0.000706714	0	0	0
Firmicutes	Clostridia	Clostridiales	Christensenellaceae		8.07673e-05	0	0	0	0	0.000302877	8.83392e-05
Proteobacteria	Gammaproteobacteria	Pseudomonadales	Pseudomonadaceae	Pseudomonas	8.07673e-05	0.000706714	0	0	0	0	0
Proteobacteria	Gammaproteobacteria	Xanthomonadales	Xanthomonadaceae	Stenotrophomonas	6.05755e-05	0	0	0	0.000265018	0	0
Proteobacteria	Betaproteobacteria	Burkholderiales	Comamonadaceae	Variovorax	6.05755e-05	0.000176678	0	0	0.000176678	0	0
Proteobacteria	Gammaproteobacteria	Vibrionales	Vibrionaceae	Photobacterium	6.05755e-05	0.000176678	0	0	0.000176678	0	0
Firmicutes	Erysipelotrichi	Erysipelotrichales	Erysipelotrichaceae	Clostridium	4.03836e-05	0	0.000353357	0	0	0	0
Firmicutes	Bacilli	Bacillales	Staphylococcaceae	Staphylococcus	4.03836e-05	0	0	0.000176678	8.83392e-05	0	0
Proteobacteria	Gammaproteobacteria	Enterobacteriales	Enterobacteriaceae	Erwinia	4.03836e-05	0	0	0	0.000176678	0	0
Proteobacteria	Gammaproteobacteria	Pasteurellales	Pasteurellaceae	Actinobacillus	4.03836e-05	0.000353357	0	0	0	0	0
Actinobacteria	Actinobacteria	Actinomycetales	Actinomycetaceae		4.03836e-05	0.000176678	0	0	8.83392e-05	0	0
Actinobacteria	Actinobacteria	Actinomycetales	Streptomycetaceae	Streptomyces	4.03836e-05	0	0	0	0.000176678	0	0
Actinobacteria	Actinobacteria	Actinomycetales	Nocardioidaceae		4.03836e-05	0	0	0	0.000176678	0	0
Firmicutes	Erysipelotrichi	Erysipelotrichales	Erysipelotrichaceae	cc_115	2.01918e-05	0	0	0	0	0.000100959	0
Firmicutes	Bacilli	Bacillales	Planococcaceae	Lysinibacillus	2.01918e-05	0	0	0	8.83392e-05	0	0
Firmicutes	Bacilli	Lactobacillales	Enterococcaceae	Enterococcus	2.01918e-05	0	0	0.000176678	0	0	0
Proteobacteria	Alphaproteobacteria	Sphingomonadales	Sphingomonadaceae	Kaistobacter	2.01918e-05	0	0	0	8.83392e-05	0	0
Proteobacteria	Alphaproteobacteria	Rhizobiales	Methylocystaceae		2.01918e-05	0	0	0	8.83392e-05	0	0
Proteobacteria	Betaproteobacteria	Neisseriales	Neisseriaceae		2.01918e-05	0	0	0	8.83392e-05	0	0
Proteobacteria	Betaproteobacteria	Burkholderiales	Oxalobacteraceae	Cupriavidus	2.01918e-05	0.000176678	0	0	0	0	0
Proteobacteria	Betaproteobacteria	Burkholderiales	Comamonadaceae	Diaphorobacter	2.01918e-05	0.000176678	0	0	0	0	0
Proteobacteria	Gammaproteobacteria	Pseudomonadales	Pseudomonadaceae		2.01918e-05	0	0	0	0	0.000100959	0
Proteobacteria	Gammaproteobacteria	Vibrionales	Vibrionaceae	Vibrio	2.01918e-05	0.000176678	0	0	0	0	0
Bacteroidetes	Flavobacteriia	Flavobacteriales	[Weeksellaceae]		2.01918e-05	0.000176678	0	0	0	0	0
Bacteroidetes	Bacteroidia	Bacteroidales	Rikenellaceae	Alistipes	2.01918e-05	0	0.000176678	0	0	0	0
Actinobacteria	Actinobacteria	Actinomycetales	Micromonosporaceae		2.01918e-05	0	0	0	8.83392e-05	0	0
Actinobacteria	Actinobacteria	Actinomycetales	Micrococcaceae	Microbispora	2.01918e-05	0.000176678	0	0	0	0	0
Actinobacteria	Actinobacteria	Actinomycetales	Microbacteriaceae		2.01918e-05	0	0	0	8.83392e-05	0	0
Actinobacteria	Actinobacteria	Actinomycetales	Propionibacteriaceae	Propionibacterium	2.01918e-05	0.000176678	0	0	0	0	0
Fusobacteria	Fusobacteriia	Fusobacteriales	Fusobacteriaceae	Fusobacterium	2.01918e-05	0	0	0.000176678	0	0	0
Fusobacteria	Fusobacteriia	Fusobacteriales	Leptotrichiaceae	Leptotrichia	2.01918e-05	0	0	0	8.83392e-05	0	0
