# Supplementary material for: How being synanthropic affects the gut bacteriome and mycobiome: comparison of two mouse species with contrasting ecologies
Source: BMC Microbiol. 2020 Jul 6;20:194. doi: 10.1186/s12866-020-01859-8 (PMC7336484; doi:10.1186/s12866-020-01859-8)
Supplement: Supplementary file 4 — Additional file 4: Table S2. Sample metadata and sequencing data accession numbers. [file 12866_2020_1859_MOESM4_ESM.xlsx]

## Sheet: Sheet1
Sample.ID	Individual.ID	Species	Sex	Locality	Gut.section	Trap.date	Accession_bacteriome	Accession_mycobiome
2959_CEWE	SK_2959	MS	M	Drienovec	caecum	2015-12-07	ERS4414334 (SAMEA6654853)	NA
2959_COWE	SK_2959	MS	M	Drienovec	colon	2015-12-07	ERS4414335 (SAMEA6654854)	ERS4414834 (SAMEA6655365)
2959_ILWE	SK_2959	MS	M	Drienovec	ileum	2015-12-07	ERS4414336 (SAMEA6654855)	ERS4414835 (SAMEA6655366)
2060_CEWE	SK_2060	MS	F	Cecejovce	caecum	2015-12-08	ERS4414326 (SAMEA6654845)	ERS4414827 (SAMEA6655358)
2060_COWE	SK_2060	MS	F	Cecejovce	colon	2015-12-08	ERS4414327 (SAMEA6654846)	ERS4414828 (SAMEA6655359)
2060_ILWE	SK_2060	MS	F	Cecejovce	ileum	2015-12-08	ERS4414328 (SAMEA6654847)	ERS4414829 (SAMEA6655360)
2061_CEWE	SK_2061	MM	F	Drienovec	caecum	2015-12-07	ERS4414329 (SAMEA6654848)	ERS4414830 (SAMEA6655361)
2061_COWE	SK_2061	MM	F	Drienovec	colon	2015-12-07	ERS4414330 (SAMEA6654849)	NA
2061_ILWE	SK_2061	MM	F	Drienovec	ileum	2015-12-07	ERS4414331 (SAMEA6654850)	ERS4414831 (SAMEA6655362)
3086_CEWE	SK_3086	MS	F	Drienovec	caecum	2015-12-07	ERS4414337 (SAMEA6654856)	ERS4414836 (SAMEA6655367)
3086_COWE	SK_3086	MS	F	Drienovec	colon	2015-12-07	ERS4414338 (SAMEA6654857)	ERS4414837 (SAMEA6655368)
3086_ILWE	SK_3086	MS	F	Drienovec	ileum	2015-12-07	ERS4414339 (SAMEA6654858)	ERS4414838 (SAMEA6655369)
3087_CEWE	SK_3087	MS	F	Drienovec	caecum	2015-12-07	ERS4414340 (SAMEA6654859)	ERS4414839 (SAMEA6655370)
3087_COWE	SK_3087	MS	F	Drienovec	colon	2015-12-07	ERS4414341 (SAMEA6654860)	ERS4414840 (SAMEA6655371)
3087_ILWE	SK_3087	MS	F	Drienovec	ileum	2015-12-07	ERS4414342 (SAMEA6654861)	ERS4414841 (SAMEA6655372)
3088_CEWE	SK_3088	MS	F	Cecejovce	caecum	2015-12-09	ERS4414343 (SAMEA6654862)	ERS4414842 (SAMEA6655373)
3088_COWE	SK_3088	MS	F	Cecejovce	colon	2015-12-09	ERS4414344 (SAMEA6654863)	ERS4414843 (SAMEA6655374)
3088_ILWE	SK_3088	MS	F	Cecejovce	ileum	2015-12-09	ERS4414345 (SAMEA6654864)	ERS4414844 (SAMEA6655375)
3089_CEWE	SK_3089	MS	M	Cecejovce	caecum	2015-12-09	ERS4414346 (SAMEA6654865)	ERS4414845 (SAMEA6655376)
3089_COWE	SK_3089	MS	M	Cecejovce	colon	2015-12-09	ERS4414347 (SAMEA6654866)	ERS4414846 (SAMEA6655377)
3089_ILWE	SK_3089	MS	M	Cecejovce	ileum	2015-12-09	ERS4414348 (SAMEA6654867)	ERS4414847 (SAMEA6655378)
3090_CEWE	SK_3090	MS	M	Cecejovce	caecum	2015-12-09	ERS4414349 (SAMEA6654868)	ERS4414848 (SAMEA6655379)
3090_COWE	SK_3090	MS	M	Cecejovce	colon	2015-12-09	ERS4414350 (SAMEA6654869)	ERS4414849 (SAMEA6655380)
3090_ILWE	SK_3090	MS	M	Cecejovce	ileum	2015-12-09	ERS4414351 (SAMEA6654870)	ERS4414850 (SAMEA6655381)
2958_COWE	SK_2958	MS	M	Drienovec	colon	2015-12-08	ERS4414332 (SAMEA6654851)	ERS4414832 (SAMEA6655363)
2958_ILWE	SK_2958	MS	M	Drienovec	ileum	2015-12-08	ERS4414333 (SAMEA6654852)	ERS4414833 (SAMEA6655364)
3174_CEWE	SK_3174	MM	F	Drienovec	caecum	2015-12-08	ERS4414352 (SAMEA6654871)	ERS4414851 (SAMEA6655382)
3174_COWE	SK_3174	MM	F	Drienovec	colon	2015-12-08	ERS4414353 (SAMEA6654872)	ERS4414852 (SAMEA6655383)
3174_ILWE	SK_3174	MM	F	Drienovec	ileum	2015-12-08	ERS4414354 (SAMEA6654873)	ERS4414853 (SAMEA6655384)
3214_CEWE	SK_3214	MM	M	Drienovec	caecum	2015-12-08	ERS4414355 (SAMEA6654874)	ERS4414854 (SAMEA6655385)
3214_COWE	SK_3214	MM	M	Drienovec	colon	2015-12-08	ERS4414356 (SAMEA6654875)	ERS4414855 (SAMEA6655386)
3214_ILWE	SK_3214	MM	M	Drienovec	ileum	2015-12-08	ERS4414675 (SAMEA6655206)	ERS4414856 (SAMEA6655387)
3215_CEWE	SK_3215	MM	M	Drienovec	caecum	2015-12-08	ERS4414676 (SAMEA6655207)	ERS4414857 (SAMEA6655388)
3215_COWE	SK_3215	MM	M	Drienovec	colon	2015-12-08	ERS4414677 (SAMEA6655208)	ERS4414858 (SAMEA6655389)
3215_ILWE	SK_3215	MM	M	Drienovec	ileum	2015-12-08	ERS4414678 (SAMEA6655209)	ERS4414859 (SAMEA6655390)
